# Supplementary material for: Spatial Analysis of Chinese American Ethnic Enclaves and Community Health Indicators in New York City
Source: Front Public Health. 2022 Jan 28;10:815169. doi: 10.3389/fpubh.2022.815169 (PMC8831844; doi:10.3389/fpubh.2022.815169)
Supplement: Supplementary file 1 [file Data_Sheet_1.XLSX]

## Sheet: Sheet1
track	white	chinese	black	oAsian	other		white	black	oAsian	other
1	3644982	0	0	0	0	0.86637
2	0	562205	0	0	0
3	0	0	2064927	0	0	0.786
4	0	0	0	597678	0	0.515292
5	0	0	0	0	1592169		242169	137192	39709.2	105782	denominator
	0.430749	0.0664391	0.244025	0.0706311	0.188156		-1.01131	-2.22099	-6.29553	-2.92781
track	white	chinese	black	oAsian	other
1	3644982	562205	0	0	0
2	0	0	0	0	796085
3	0	0	2064927	0	0
4	0	0	0	597678	0
5	0	0	0	0	796084		487078	0	0	0	numerator	0.86637
							-1.01131	1	1	1
track	white	chinese	black	oAsian	other
1	3644982	0	0	0	0
2	0	562205	0	597678	0
3	0	0	2064927	0	0
4	0	0	0	0	796085
5	0	0	0	0	796084		0	0	289700	0	numerator	0.515292
							1	1	-6.29553	1
track	white	chinese	black	oAsian	other
1	3644982	0	0	0	0
2	0	0	0	597678	0
3	0	562205	2064927	0	0
4	0	0	0	0	796085
5	0	0	0	0	796084		0	441893	0	0	numerator	0.786
							1	-2.22099	1	1
track	white	non-white
1	600000	93333.3
2	600000	93333.3
3	600000	93333.3
4	600000	93333.3
5	1200000	186667	denom	484615	0	min of E
	0.865385	0.134615	numer	484615	0	E
track	white	non-white
1	200000	280000
2	400000	186667
3	600000	46666.7
4	1200000	23333.3
5	1200000	23333.3	denom	484615	0	min of E
	0.865385	0.134615	numer	333015	0.312826	E
